# Supplementary material for: Use of prehospital qSOFA in predicting in-hospital mortality in patients with suspected infection: A retrospective cohort study
Source: PubMed Central journal article supplement (PMC6504075; doi:10.1371/journal.pone.0216560), 2019-05-07
Supplement: pone.0216560.s001.pdf [file pone.0216560.s001.pdf]

**S1 Table. Demographic data of the patients and characteristics that include laboratories, site of infection, and type of organisms**

|                                  | prehospital qSOFA<br>negative (<2)<br>(N=452) | prehospital qSOFA<br>positive (≥2)<br>(N=473) | p value |
|----------------------------------|-----------------------------------------------|-----------------------------------------------|---------|
| <b>Laboratory (median [IQR])</b> |                                               |                                               |         |
| Leucocytes, cells/ml             | 10,100 [7,300, 1,300]                         | 10,700 [7,200, 14,700]                        | 0.14    |
| Hematocrit, %                    | 36.3 [32.5, 40.4]                             | 35.9 [31.4, 40]                               | 0.12    |
| Platelet, 10 <sup>3</sup> /μl    | 18.9 [14.7, 24.8]                             | 19.2 [14.3, 26.0]                             | 0.56    |
| PT-INR                           | 1.08 [1.02, 1.18]                             | 1.13 [1.04, 1.25]                             | <0.01   |
| Na, mEq/l                        | 136 [132, 138]                                | 135 [131, 139]                                | <0.05   |
| K, mEq/l                         | 3.9 [3.5, 4.3]                                | 4.1 [3.7, 4.5]                                | <0.01   |
| Total bilirubin, mg/dl           | 0.7 [0.5, 1.1]                                | 0.65 [0.4, 1]                                 | 0.10    |
| Creatinin, mg/dl                 | 0.76 [0.59, 1.1]                              | 0.77 [0.54, 1.18]                             | 0.87    |
| CRP, mg/dl                       | 4.52 [1.25, 11.09]                            | 5.20 [1.78, 11.99]                            | 0.10    |
| Glucose, mg/dl                   | 121 [105, 150]                                | 125 [105, 158]                                | 0.14    |
| Lactate (mmol/l)                 | 1.5 [1.1, 2.2]                                | 1.8 [1.1, 3.3]                                | <0.01   |
| <b>Site of infection (%)</b>     |                                               |                                               | 0.12    |
| Bloodstream                      | 13 (2.9)                                      | 16 (3.4)                                      |         |
| Respiratory                      | 214 (47.4)                                    | 264 (55.8)                                    |         |
| Gastrointestinal                 | 69 (15.3)                                     | 50 (10.6)                                     |         |
| Neurological                     | 5 (1.1)                                       | 8 (1.7)                                       |         |
| Genitourinary                    | 110 (24.3)                                    | 100 (21.1)                                    |         |
| Musculoskeletal                  | 30 (6.6)                                      | 23 (4.9)                                      |         |
| Other                            | 11 (2.4)                                      | 12 (2.5)                                      |         |
| <b>Type of organism (%)</b>      |                                               |                                               | 0.62    |
| Not specified                    | 217 (48.0)                                    | 229 (48.4)                                    |         |
| Escherichia coli                 | 77 (17.0)                                     | 65 (13.7)                                     |         |
| Klebsiella pneumoniae            | 20 (4.4)                                      | 34 (7.2)                                      |         |
| Pseudomonas aeruginosa           | 10 (2.2)                                      | 10 (2.1)                                      |         |
| Other GNR                        | 35 (7.7)                                      | 38 (8.0)                                      |         |
| GNC                              | 8 (1.8)                                       | 9 (1.9)                                       |         |
| Staphylococcus aureus            | 5 (1.1)                                       | 7 (1.5)                                       |         |
| Streptococcus pneumoniae         | 11 (2.4)                                      | 10 (2.1)                                      |         |
| Streptococcus species            | 17 (3.8)                                      | 14 (3.0)                                      |         |
| Other GPC                        | 10 (2.2)                                      | 5 (1.1)                                       |         |
| GPR                              | 3 (0.7)                                       | 7 (1.5)                                       |         |
| Polymicrobial infection          | 39 (8.6)                                      | 45 (9.5)                                      |         |
